# Supplementary material
Source: PubMed Central journal article supplement (PMC4875440)

**Supplementary Table 1.** Genotype frequencies of p53 Arg72Pro in HBV patients and healthy subjects

|                 | Patients with HBV infection         |                          |                              |                                      |              |                                                     | Healthy subjects (n=96) <sup>a</sup> |            |
|-----------------|-------------------------------------|--------------------------|------------------------------|--------------------------------------|--------------|-----------------------------------------------------|--------------------------------------|------------|
|                 | Total patients (n=580) <sup>a</sup> | HCC (n=350) <sup>a</sup> | Non-HCC (n=230) <sup>a</sup> | Crude OR (95% CI) HCC versus Non-HCC | P-value      | Adjusted OR(95% CI) HCC versus Non-HCC <sup>b</sup> |                                      | P-value    |
| Genotype        |                                     |                          |                              |                                      |              |                                                     |                                      |            |
| Arg/Arg         | 189 (32.59)                         | 103 (29.43)              | 86 (37.39)                   | 1                                    |              | 1                                                   |                                      | 32 (33.34) |
| Arg/Pro         | 283 (48.79)                         | 174 (49.71)              | 109 (47.39)                  | 1.33(0.92-1.94)                      | 0.131        | 1.41 (0.92-2.16)                                    | 0.112                                | 50 (52.08) |
| Pro/Pro         | 108 (18.62)                         | 73 (20.86)               | 35 (15.22)                   | 1.74 (1.06-2.85)                     | <b>0.028</b> | 1.88 (1.07-3.32)                                    | <b>0.029</b>                         | 14 (14.58) |
| Recessive model |                                     |                          |                              |                                      |              |                                                     |                                      |            |
| Arg/Arg+Arg/Pro | 472 (81.38)                         | 277 (79.14)              | 195 (84.78)                  | 1                                    |              | 1                                                   |                                      | 82 (85.42) |
| Pro/Pro         | 108 (18.62)                         | 73 (20.86)               | 35 (15.22)                   | 1.47 (0.94-2.29)                     | 0.089        | 1.53 (0.92-2.54)                                    | 0.100                                | 14 (14.58) |
| Dominant model  |                                     |                          |                              |                                      |              |                                                     |                                      |            |
| Arg/Arg         | 189 (32.59)                         | 103 (29.43)              | 86 (37.39)                   | 1                                    |              | 1                                                   |                                      | 32 (33.34) |
| Arg/Pro+Pro/Pro | 391 (67.41)                         | 247 (70.57)              | 144 (62.61)                  | 1.432 (1.01-2.04)                    | 0.046        | 1.52(1.02-2.28)                                     | 0.040                                | 64 (66.66) |

<sup>a</sup> Values expressed as n (%).<sup>b</sup> Adjusted for gender, age, and alpha-fetoprotein level.**Supplementary Table 2.** Genotype frequencies of MDM2 SNP 309 in HBV patients and healthy subjects.

|                 | Patients with HBV infection         |                          |                              |                                      |         |                                                     | Healthy subjects (n=96) <sup>a</sup> |            |
|-----------------|-------------------------------------|--------------------------|------------------------------|--------------------------------------|---------|-----------------------------------------------------|--------------------------------------|------------|
|                 | Total patients (n=580) <sup>a</sup> | HCC (n=350) <sup>a</sup> | Non-HCC (n=230) <sup>a</sup> | Crude OR (95% CI) HCC versus Non-HCC | P-value | Adjusted OR(95% CI) HCC versus Non-HCC <sup>b</sup> |                                      | P-value    |
| Genotype        |                                     |                          |                              |                                      |         |                                                     |                                      |            |
| T/T             | 148(25.52)                          | 89(25.43)                | 59(25.65)                    | 1                                    |         | 1                                                   |                                      | 19 (19.79) |
| T/G             | 292(50.34)                          | 176(50.29)               | 116(50.43)                   | 1.01(0.67-1.51)                      | 0.978   | 0.94(0.59-1.48)                                     | 0.777                                | 49 (51.04) |
| G/G             | 140(24.14)                          | 85(24.28)                | 55(23.92)                    | 1.03(0.64-1.64)                      | 0.920   | 1.12(0.65-1.93)                                     | 0.685                                | 28 (29.17) |
| Recessive model |                                     |                          |                              |                                      |         |                                                     |                                      |            |
| T/T+T/G         | 440(75.86)                          | 265(75.71)               | 175(76.08)                   | 1                                    |         | 1                                                   |                                      | 68 (70.83) |
| G/G             | 140(24.14)                          | 85(24.29)                | 55(23.92)                    | 1.02(0.69-1.51)                      | 0.918   | 1.17(0.743-1.84)                                    | 0.500                                | 28 (29.17) |
| Dominant model  |                                     |                          |                              |                                      |         |                                                     |                                      |            |
| T/T             | 148(25.52)                          | 89(25.43)                | 59(25.65)                    | 1                                    |         | 1                                                   |                                      | 19 (19.79) |
| T.G+G/G         | 432(74.48)                          | 261(74.57)               | 171(74.35)                   | 1.01(0.69-1.48)                      | 0.952   | 0.99 (0.64-1.53)                                    | 0.968                                | 77 (80.21) |

<sup>a</sup> Values expressed as n(%).<sup>b</sup> Adjusted for gender, age, and alpha-fetoprotein level.

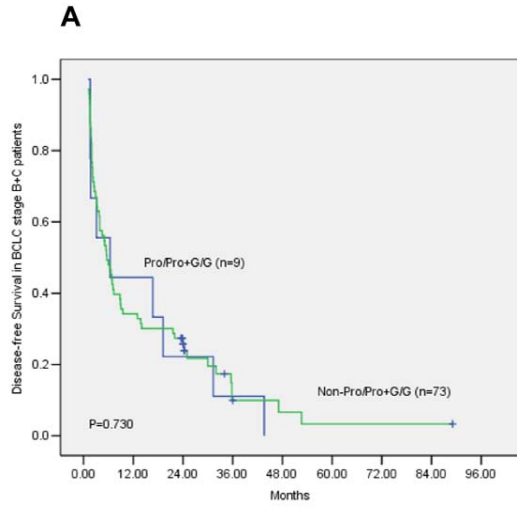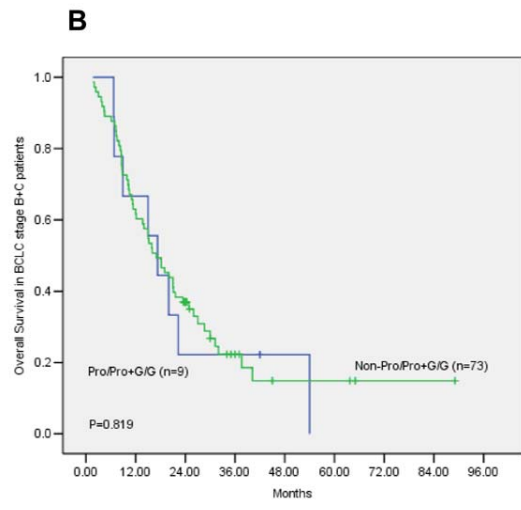

Supplement: 13238_2012_2067_MOESM1_ESM.pdf [file 13238_2012_2067_MOESM1_ESM.pdf]
